# Supplementary material for: Diet and mitochondrial DNA haplotype of a sperm whale (Physeter macrocephalus) found dead off Jurong Island, Singapore
Source: PeerJ. 2019 Apr 5;7:e6705. doi: 10.7717/peerj.6705 (PMC6452849; doi:10.7717/peerj.6705)
Supplement: Table S1 [file peerj-07-6705-s001.xlsx]

## Sheet: LRL
Cephalopods and lower rostral length (LRL) of beaksfound in Singapore sperm whale stomach
LRL fields marked "-" indicate damage to the beaks that prevented accurate measurement of LRL; SD = standard deviation
No.	ID	Total no.	LRL (mm)	Average LRL (mm)	SD
Ancistrocheiridae
1	Ancistrocheirus lesueurii	118	5.3	5.363	0.361996
			5.6
			6
			5.5
			5.3
			5.8
			4.9
			4.7
			5.2
			5.2
			4.7
			4.9
			4.9
			5.3
			5.3
			4.8
			5.1
			5.2
			6
			5.2
			5.1
			5.1
			5.2
			5.2
			5.3
			5.3
			5.6
			5
			4.3
			5
			5.6
			5.4
			5.9
			5.3
			5.4
			5.5
			5.7
			5.7
			5.5
			5.1
			6.1
			5.4
			5.9
			5.8
			5.8
			5.1
			5.6
			6.4
			5.2
			5
			5.5
			5.3
			5.5
			5.5
			5.3
			5.2
			5
			5.3
			5.1
			4.9
			5.4
			5
			5.7
			5.4
			5.7
			5.8
			5.4
			5.4
			6.2
			5
			5.4
			5.6
			5.6
			5.6
			5.4
			5.6
			5.9
			5.5
			5.6
			5.5
			5.4
			5.2
			5
			6.2
			4.7
			5
			6
			5
			5
			5.2
			5.3
			5.2
			5.1
			5.3
			5.5
			5.5
			5
			5.3
			5.5
			5.2
Chiroteuthidae
2	Asperoteuthis acanthoderma	25	7.6	7.812	2.3035
			11.2
			8.9
			10.5
			9.8
			9.9
			10
			5.1
			10.5
			10.1
			10.2
			10.5
			6.8
			10.5
			6.5
			5.2
			5
			4.9
			6.5
			6.4
			6.9
			7.1
			4.5
			5
			5.7
3	Chiroteuthis imperator	139	10.2	9.294	0.591421
			9.8
			9.9
			9.3
			9.9
			9.9
			10.4
			9.9
			7.7
			9.5
			10
			9.8
			9.3
			9.3
			8.2
			9.4
			9.2
			9.2
			10.7
			10.4
			10.5
			8.6
			9.5
			9.4
			9.7
			9
			8.9
			9.3
			9.7
			9.7
			9.8
			9
			9.8
			9.9
			9
			9.8
			9
			10.3
			8.7
			8.4
			9.2
			9.2
			9
			9.4
			10
			9.1
			9.9
			9.9
			9.4
			9.5
			8.3
			8.3
			9
			9.4
			9.8
			9.8
			9.8
			9.3
			9.4
			8.2
			9.7
			9
			9
			8.3
			9
			10.5
			9.9
			8.5
			9.6
			9.6
			9.2
			9.2
			8.8
			9.1
			9.1
			9.7
			8.6
			8.3
			8.8
			9.4
			9.9
			9.7
			9.8
			8.8
			9
			9.1
			9.1
			9.1
			9
			9.6
			9
			9
			8.3
			8.3
			8.5
			9.4
			8.6
			8.9
			8.3
			8.8
4	Chiroteuthidae A	115	5.4	4.994	0.294975
			5.4
			5.3
			4.6
			5.2
			5.1
			4.6
			4.9
			5.5
			5.2
			4.9
			4.9
			5.1
			4.3
			4.7
			4.8
			5
			4.5
			5
			4.7
			5.1
			5.1
			5.2
			4.8
			4.9
			5
			5
			4.9
			4.8
			5
			5.2
			5.2
			5
			4.9
			4.7
			4.9
			5.2
			5.1
			5.1
			5.3
			5
			5
			5.9
			5.3
			4.5
			5.3
			5.1
			5.1
			4.9
			4.8
			5
			5.3
			4.2
			4.8
			4.6
			4.6
			5
			4.4
			5
			4.8
			5.2
			4.8
			5.2
			5
			5
			4.5
			5.2
			4.7
			5
			5
			5.4
			5
			5.2
			5.3
			5
			5.6
			4.9
			5.4
			5.4
			4.9
			4.9
			5.6
			5.3
			5.2
			4.8
			4.6
			5
			4.9
			5.2
			5
			4.8
			4.8
			5
			5.2
			5
			5
			4.4
			5.3
			4.8
			4.8
Cranchiidae
5	Megalocranchia maxima	1	15.5
6	Taonius cf. belone	15	6.9	6.72	0.919783
			8.1
			5.2
			6.4
			6.3
			6.3
			7.1
			6.8
			7.8
			6.7
			5.9
			5.3
			6.3
			7.4
			8.3
7	Taonius pavo	523	10.4	9.874	0.845023
			9.9
			9.9
			9.9
			10.2
			8.9
			10.4
			10.9
			9.8
			9.5
			9.3
			10.7
			9
			8.6
			10
			10
			10.6
			5.5
			10.7
			9.3
			10.5
			10.1
			9.4
			10.7
			10.4
			9.6
			10.5
			10
			10.2
			9.9
			9
			10.5
			10.6
			10.4
			11.1
			10.1
			11.2
			10.6
			10.6
			10
			8.8
			9.5
			11.1
			9.9
			9.9
			9.9
			10.5
			10.9
			6.9
			9.9
			10.3
			8.9
			9.4
			9.3
			9.6
			10.2
			10.1
			8.4
			10.3
			9.3
			10.6
			10.6
			9.2
			9.2
			10.5
			10.5
			10.2
			9.9
			10.1
			9.3
			9.3
			9.3
			9
			10.4
			9.8
			10
			9
			9.3
			10.6
			11.2
			9.4
			9.6
			8.8
			9.5
			9.2
			9.3
			9.7
			9.7
			9.2
			10.3
			10.5
			10.8
			10.3
			10.6
			10.7
			11.2
			9.2
			10.1
			8.9
			10.4
8	Taonius A	3	8.5	8.5
Histioteuthidae
9	Histoteuthis inermis	115	4.7	4.45398
			4.4
			4.8
			4.6
			4.3
			4.4
			4.6
			4.3
			4.8
			4
			4.3
			4.2
			4.2
			4.3
			4.3
			4.5
			4.4
			4
			4.3
			4.1
			4.2
			4.3
			4.6
			4.4
			4.6
			4.4
			4.4
			4.7
			4.5
			4.3
			4.4
			4.1
			4.3
			4.3
			4.1
			4.3
			4.5
			4.6
			4.4
			4.2
			4.3
			4.3
			4.7
			4.7
			4.5
			4.6
			4.3
			4.5
			4.2
			4.6
			4.1
			4.3
			4.1
			4.3
			4.2
			4.6
			4.8
			4.3
			4.5
			4.6
			4.5
			5.2
			4.8
			4.5
			4.6
			4.3
			4.5
			4.5
			4.8
			4.2
			4.6
			4.5
			4.8
			4.3
			4.3
			4.6
			4.4
			4.7
			4.4
			4.6
			5
			4.5
			4.4
			4.9
			-
			4.8
			4.6
			4.8
			4.6
			4.7
			4.4
			4.4
			4.4
			4.1
			4.2
			4.2
			4.6
			4.2
			4.4
			4.8
			4.4
			4.3
			4.2
			4.4
			4.5
			4.4
			4.8
			4.8
			4.8
			4.2
			3.8
			4.2
			4.9
			4.9
10	Histoteuthis A "inermis large"	45	6.4	6.13846
			5.9
			6.5
			5.8
			-
			6.8
			6.6
			6.4
			-
			6.1
			-
			6.2
			6.7
			5.3
			5.3
			6.3
			6.1
			6.3
			6.3
			5.8
			-
			6.1
			5.9
			5.8
			6.7
			6
			6.6
			5.8
			5.8
			5.7
			5.8
			6.8
			5.7
			6.1
			6.9
			7
			5.5
			6.5
			6.1
			6.4
			6.4
			5
			6
11	Histioteuthis pacifica	318	4.2	4.218
			4
			4
			4.8
			4.5
			4.5
			4.2
			4.2
			4.5
			4.2
			4.2
			4.2
			4
			4.1
			3.8
			4.1
			4.5
			4.1
			3.8
			4.1
			4.1
			4.1
			4.3
			4.3
			4.2
			3.8
			4.4
			3.9
			4.1
			4
			4.3
			3.7
			4.1
			4.2
			4.1
			4.1
			4.1
			4.6
			4
			4
			4.1
			4.1
			4.4
			4.5
			4.2
			4.8
			4.7
			4.4
			4.6
			4.9
			4.3
			4.2
			4.1
			4.1
			4.5
			4.5
			4.2
			4.2
			4.2
			3.8
			4.2
			4.5
			4
			4.8
			4.2
			4.2
			4.2
			4.2
			4.1
			4.6
			4.4
			4.3
			4.3
			4.3
			4.6
			4.9
			4
			4.5
			4.1
			4.2
			4.2
			4.6
			4.4
			4.2
			4.2
			4.2
			4.5
			2.8
			4
			4.2
			4.2
			4.3
			4.1
			4.1
			4.1
			4
			3.8
			4.1
			4.1
			3.9
Octopoteuthidae
12	Taningia danae	6	16.1	15.9	0.867948
			14.8
			15.8
			16.9
13	Octopoteuthidae sp.	115	8.8	8.51161	0.609053
			8.6
			10.2
			8.2
			9.4
			8.9
			8.6
			8.4
			8.3
			8.7
			8.2
			8.7
			8.7
			8.3
			9.5
			8.6
			9.1
			9.1
			8.4
			8.7
			8.7
			8.7
			7.7
			9
			8.3
			8.3
			8.4
			8.3
			9
			7.7
			7.7
			8.9
			8.3
			9.5
			8.5
			7.2
			8.3
			8.1
			8.2
			9.4
			9.1
			9.4
			8.3
			8.5
			8.2
			8.9
			8.2
			9
			9
			9.3
			8.8
			8.6
			8.6
			8.9
			9.5
			8.6
			8.1
			8
			8
			8.1
			8.1
			9
			8.6
			7.6
			9.1
			9.1
			8.3
			8.9
			8.3
			9
			8.5
			8.5
			7
			8.2
			7.5
			8.7
			8.7
			9.4
			8.2
			7.9
			8.2
			8.5
			8.4
			6.7
			8
			9
			9.7
			8.4
			8
			7.4
			10
			8
			7.6
			6.8
			8.3
			8.3
			8.2
			9
			9
			8
			8.9
			9.1
			8.1
			8.5
			8.5
			8.5
			8.1
			8.2
			8.7
			8.7
			7.7
			9.5
Onychoteuthidae
14	Onykia loennbergii	31	7.9	5.71	1.19145
			4.1
			8.7
			8.2
			5.2
			4.4
			4.8
			6.5
			5.8
			5
			5
			8.2
			6
			5.9
			5.9
			5.3
			5.3
			5
			5
			6.5
			7
			5
			5
			5.1
			5.3
			5
			4.7
			4.8
			5.2
			5.5
			5.6
Pholidoteuthidae
15	Pholidoteuthis massyae	17	5.7	6.27059	0.338683
			6.7
			6.5
			6.5
			6.5
			5.7
			6
			6.5
			6.2
			6
			6.5
			6.6
			5.9
			6.3
			6.4
			6.7
			5.9
Alloposidae
16	Haliphron atlanticus	40	12.2	11.5806	1.88009
			5.6
			11.5
			13.3
			11.6
			10.8
			10.6
			13
			13.2
			13.1
			12.7
			9.8
			10.7
			11.1
			8.7
			11.3
			9.8
			11.2
			12.9
			16.2
			12.3
			9.5
			14.3
			11.1
			11.3
			12.7
			13.5
			11.4
			8.5
			11.5
			11.2
			10.9
			11.8
			14.1
			10.8
			12.7
No ID
17	A	3
18	B	2
19	C	6
20	D	3
21	E	2
22	F	2
23	G	1
24	H	3
25	I	9
